# Supplementary material for: Large-Scale Functional Genomics Screen to Identify Modulators of Human β-Cell Insulin Secretion
Source: MDPI journal article supplement (doi:10.3390/biomedicines10010103), 2022-01-04
Supplement: s1 [file s1]

# Large-Scale Functional Genomics Screen to Identify Modulators of Human $\beta$ -Cell Insulin Secretion

Iwona Szczerbinska <sup>1,\*</sup>, Annamaria Tessitore <sup>2</sup>, Lena Kristina Hansson <sup>3</sup>, Asmita Agrawal <sup>2</sup>, Alejandro Ragel Lopez <sup>2</sup>, Marianne Helenius <sup>3,4</sup>, Andrzej R. Malinowski <sup>1</sup>, Barak Gilboa <sup>2</sup>, Maxwell A. Ruby <sup>1</sup>, Ramneek Gupta <sup>3</sup> and Carina Ämmälä <sup>1</sup>

<sup>1</sup> Department of Discovery Biology and Pharmacology, Novo Nordisk Research Centre Oxford, Oxford, UK; armalinowski@gmail.com (A.R.M.), mwry@novonordisk.com (M.A.R.), caaq@novonordisk.com (C.Ä.)

<sup>2</sup> Department of Discovery Technology and Genomics, Novo Nordisk Research Centre Oxford, Oxford, UK; azte@novonordisk.com (A.T.), vaw1@novonordisk.com (A.A.), azrl@novonordisk.com (A.R.L.), bkgi@novonordisk.com (B.G.)

<sup>3</sup> Department of Computational Biology, Novo Nordisk Research Centre Oxford, Oxford, UK; lena@hpldesign.se (L.K.H.), nqmh@novonordisk.com (M.H.), rmgp@novonordisk.com (R.G.)

<sup>4</sup> Department of Health Technology, Technical University of Denmark, DK-2800 Kongens Lyngby, Denmark

\* Correspondence: iwsz@novonordisk.com

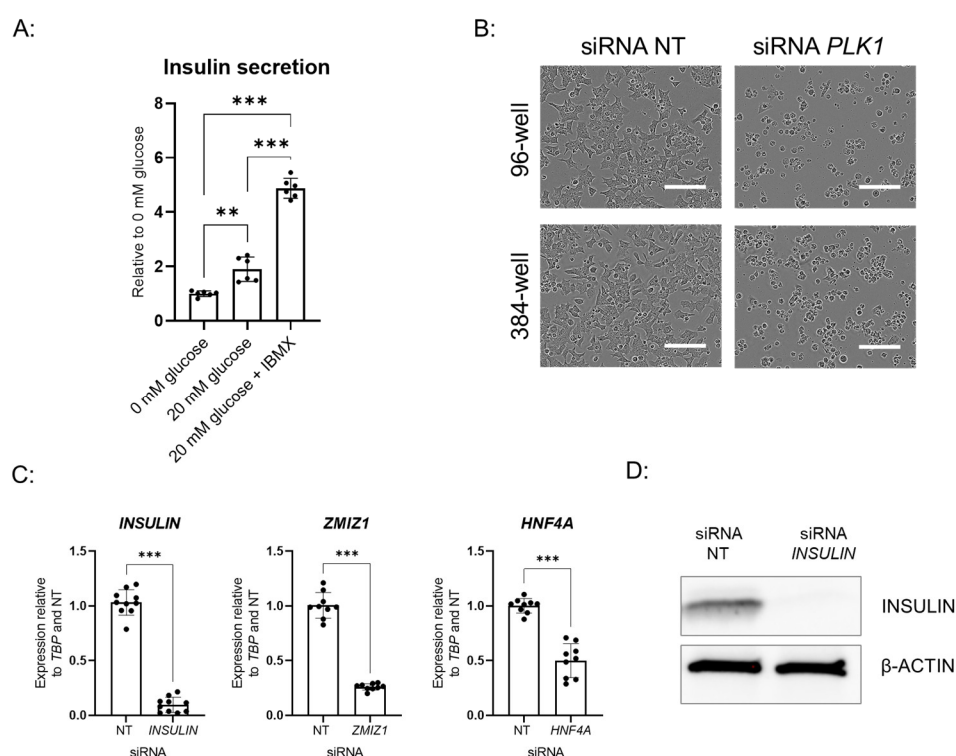

**Figure S1.** Establishment of siRNA knockdown and GSIS assay in EndoC- $\beta$ H1 cells. **(A)** Glucose stimulated insulin secretion (GSIS) assay in EndoC- $\beta$ H1 cells cultured in a 96-well format. Data points are the mean  $\pm$  SD  $n = 6$  for each condition. \*\* $p$  value  $< 0.01$ , \*\*\* $p$  value  $< 0.001$ , one-way ANOVA. **(B)** Representative images of cells after *PLK1* and non-targeting control (NT) siRNA knockdown in EndoC- $\beta$ H1 cells cultured in 96-well and 384-well format. Scale bar 100  $\mu$ m. **(C)** Relative expression of *INSULIN*, *ZMIZ1* and *HNF4A* after siRNA knockdown in a 96-well format. Data points are the mean  $\pm$  SD  $n = 9$  of independent wells from three experiments. \*\*\* $p$  value  $< 0.001$ ,  $t$ -test. **(D)** Western blot analysis of *INSULIN* and  $\beta$ -ACTIN after NT and *INSULIN* siRNA knockdown.

A:

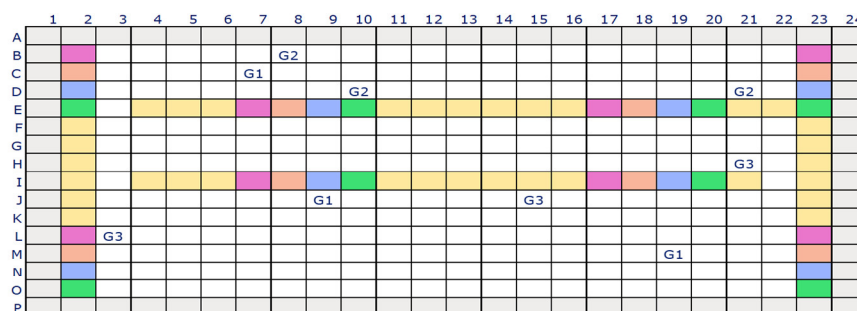

siRNA NT  
 siRNA *INSULIN*  
 siRNA *PLK1*  
 siRNA *ZMIZ1*  
 siRNA *HNF4A*  
 G1 candidate gene 1  
 G2 candidate gene 2  
 G3 candidate gene 3

**Details of the screen:**

Cell number seeded: 15,000 per well  
 Controls per plate: siRNA NT n=33, siRNA *INSULIN*, *ZMIZ1*, *HNF4A*, *PLK1* n=8  
 Number of replicates for target: n=3 (position randomised within plate)  
 Conditions: 0 mM glucose, 20 mM glucose, 20 mM glucose + IBMX  
 Time point: GSIS 6 days post-transfection  
 Total number of plates: 21 x 384well

B:

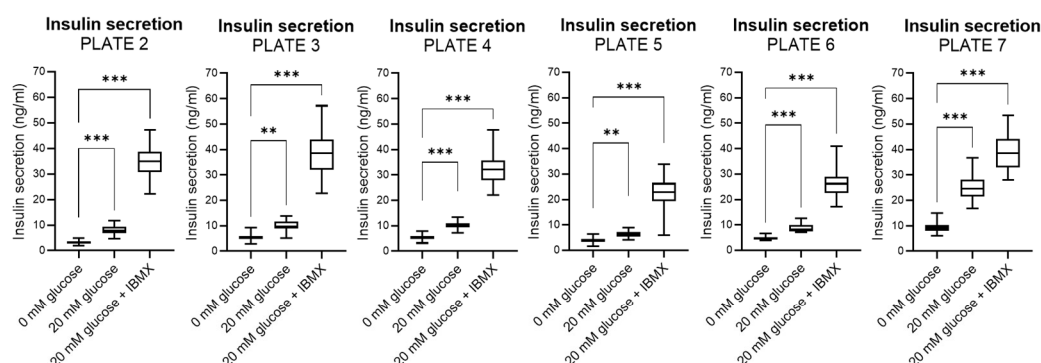

C:

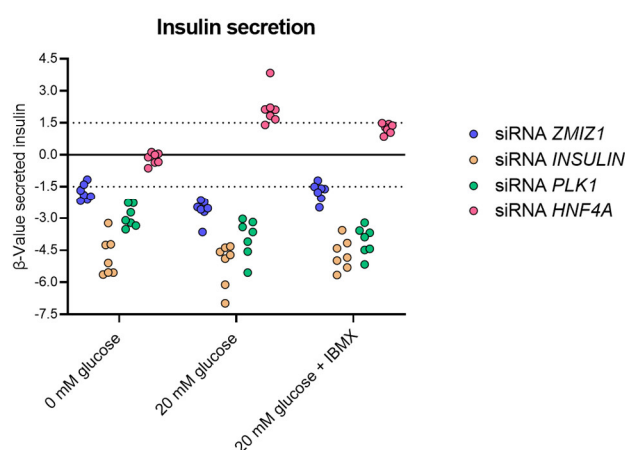

**Figure S2:** siRNA high-throughput screen in EndoC- $\beta$ H1 cells with a GSIS readout. **(A)** Details of the siRNA high-throughput screen with a plate map example showing positions of controls (different colours) and randomized siRNAs positions for each replicate (n = 3) of text mining genes (candidate gene 1-3, G1-G3). **(B)** Insulin secretion data for non-targeting controls (siRNA NT) for Plates 2-7 in three conditions (0 mM glucose, 20 mM glucose, 20 mM glucose + IBMX). Box plots show min max of n = 33 for siNT. \*\*p value < 0.01, \*\*\*p value < 0.001 by one-way ANOVA. **(C)** Dot plot of  $\beta$ -values for secreted insulin corresponding to controls on each plate. Each dot represents the  $\beta$ -value from a different assay plate (Plate 1 - Plate 7) in three conditions (0 mM glucose, 20 mM glucose, 20 mM glucose + IBMX).

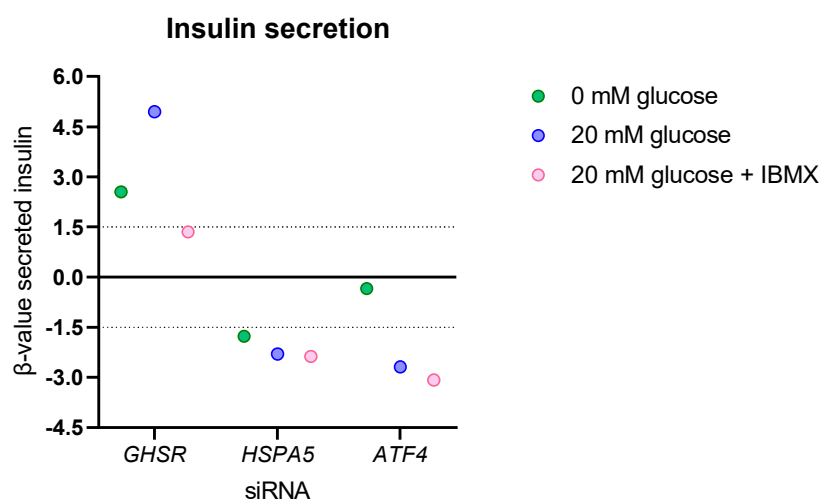

**Figure S3.** Insulin secretion ( $\beta$ -value) for the hits selected for validation. Dot plot depicting  $\beta$ -value for secreted insulin after knockdown of *GHSR*, *HSPA5* and *ATF4* in three GSIS conditions during the screen. Black dotted lines show selected  $\beta$ -value cut-offs of  $\geq 1.5$  and  $\leq -1.5$ .

**Table S1.** UniProt IDs of text mining genes screened in this study.

|             |             |             |             |             |
|-------------|-------------|-------------|-------------|-------------|
| 4EBP1_HUMAN | ADIPL_HUMAN | ANXA6_HUMAN | BDNF_HUMAN  | CCKN_HUMAN  |
| A4_HUMAN    | ADIPO_HUMAN | AOFB_HUMAN  | BECN1_HUMAN | CCL11_HUMAN |
| AA2AR_HUMAN | ADR1_HUMAN  | APEL_HUMAN  | BIP_HUMAN   | CCL19_HUMAN |
| AAPK1_HUMAN | ADRB2_HUMAN | APLD1_HUMAN | BMAL1_HUMAN | CCL2_HUMAN  |
| AAPK2_HUMAN | ADRB3_HUMAN | APOA_HUMAN  | BMP4_HUMAN  | CCL3_HUMAN  |
| AATM_HUMAN  | AGRB3_HUMAN | APOA1_HUMAN | BMP7_HUMAN  | CCL4_HUMAN  |
| ABCA1_HUMAN | AGRE1_HUMAN | APOA2_HUMAN | BSCL2_HUMAN | CCL5_HUMAN  |
| ABCG1_HUMAN | AGRP_HUMAN  | APOA4_HUMAN | C163A_HUMAN | CCN2_HUMAN  |
| ABCG5_HUMAN | AGTR1_HUMAN | APOA5_HUMAN | C1QT1_HUMAN | CCN4_HUMAN  |
| ABH15_HUMAN | AGTR2_HUMAN | APOB_HUMAN  | C1QT3_HUMAN | CCND1_HUMAN |
| ABHD5_HUMAN | AKT1_HUMAN  | APOC3_HUMAN | C1QT6_HUMAN | CCR2_HUMAN  |
| ABHD6_HUMAN | AKT2_HUMAN  | APOD_HUMAN  | C1T9A_HUMAN | CCR5_HUMAN  |
| ACACA_HUMAN | ALAT1_HUMAN | APOE_HUMAN  | C2CD5_HUMAN | CD14_HUMAN  |
| ACACB_HUMAN | AMYP_HUMAN  | APOM_HUMAN  | CAC1E_HUMAN | CD36_HUMAN  |
| ACADL_HUMAN | AN36A_HUMAN | AQP7_HUMAN  | CADM2_HUMAN | CD4_HUMAN   |
| ACADM_HUMAN | ANDR_HUMAN  | ARGI1_HUMAN | CART_HUMAN  | CD40L_HUMAN |
| ACE_HUMAN   | ANF_HUMAN   | ARV1_HUMAN  | CASP1_HUMAN | CD68_HUMAN  |
| ACE2_HUMAN  | ANFB_HUMAN  | ATF3_HUMAN  | CASP3_HUMAN | CEAM1_HUMAN |
| ACLY_HUMAN  | ANGL3_HUMAN | ATF4_HUMAN  | CATA_HUMAN  | CEBPA_HUMAN |
| ACOD_HUMAN  | ANGL4_HUMAN | ATF6A_HUMAN | CAV1_HUMAN  | CEBPB_HUMAN |
| ACOX1_HUMAN | ANGL8_HUMAN | ATG5_HUMAN  | CBPE_HUMAN  | CERT_HUMAN  |
| ACS2L_HUMAN | ANGT_HUMAN  | ATG7_HUMAN  | CBPM_HUMAN  | CETP_HUMAN  |
| ACTC_HUMAN  | ANPRA_HUMAN | BCL2_HUMAN  | CCD80_HUMAN | CFAD_HUMAN  |

|             |              |             |             |             |
|-------------|--------------|-------------|-------------|-------------|
| CIDEA_HUMAN | DPP4_HUMAN   | FTO_HUMAN   | HGF_HUMAN   | GTR9_HUMAN  |
| CIDEC_HUMAN | DUPD1_HUMAN  | G3P_HUMAN   | HIF1A_HUMAN | GYS1_HUMAN  |
| CISY_HUMAN  | E2AK3_HUMAN  | G6PC_HUMAN  | HMDH_HUMAN  | HDA11_HUMAN |
| CML1_HUMAN  | EDN1_HUMAN   | G6PD_HUMAN  | HMGB1_HUMAN | HDAC7_HUMAN |
| CNR1_HUMAN  | EF1A2_HUMAN  | GALA_HUMAN  | HMOX1_HUMAN | HEPC_HUMAN  |
| CO1A1_HUMAN | EGF_HUMAN    | GAST_HUMAN  | HNF1A_HUMAN | HGF_HUMAN   |
| CO3_HUMAN   | EGFR_HUMAN   | GCR_HUMAN   | HNF1B_HUMAN | HIF1A_HUMAN |
| COG5_HUMAN  | ELAF_HUMAN   | GDF15_HUMAN | HPGDS_HUMAN | HMDH_HUMAN  |
| COLI_HUMAN  | ENC1_HUMAN   | GDF8_HUMAN  | HPT_HUMAN   | HMGB1_HUMAN |
| COPA_HUMAN  | ENHO_HUMAN   | GHR_HUMAN   | HS12A_HUMAN | HMOX1_HUMAN |
| COX41_HUMAN | EPO_HUMAN    | GHRL_HUMAN  | HSP74_HUMAN | HNF1A_HUMAN |
| CP19A_HUMAN | ERBB4_HUMAN  | GHSR_HUMAN  | HXK1_HUMAN  | HNF1B_HUMAN |
| CP2E1_HUMAN | EREG_HUMAN   | GIP_HUMAN   | HXK2_HUMAN  | HPGDS_HUMAN |
| CP7A1_HUMAN | ERF3B_HUMAN  | GIPR_HUMAN  | HXK3_HUMAN  | HPT_HUMAN   |
| CPT1A_HUMAN | ERN1_HUMAN   | GLP1R_HUMAN | HXK4_HUMAN  | HS12A_HUMAN |
| CPT1B_HUMAN | ESR1_HUMAN   | GLR_HUMAN   | IAPP_HUMAN  | HSP74_HUMAN |
| CPT1C_HUMAN | F16P1_HUMAN  | GLUC_HUMAN  | IBP1_HUMAN  | HXK1_HUMAN  |
| CPT2_HUMAN  | FABP4_HUMAN  | GLUT4_HUMAN | IBP2_HUMAN  | HXK2_HUMAN  |
| CREG1_HUMAN | FABP5_HUMAN  | GNA12_HUMAN | IBP3_HUMAN  | HXK3_HUMAN  |
| CRF_HUMAN   | FABPH_HUMAN  | GP119_HUMAN | ICAM1_HUMAN | HXK4_HUMAN  |
| CRP_HUMAN   | FABPI_HUMAN  | GP142_HUMAN | IDE_HUMAN   | IAPP_HUMAN  |
| CRTC2_HUMAN | FABPL_HUMAN  | GPBAR_HUMAN | IF2A_HUMAN  | IBP1_HUMAN  |
| CSF2_HUMAN  | FAS_HUMAN    | GPC5B_HUMAN | IF5A1_HUMAN | IBP2_HUMAN  |
| CTNB1_HUMAN | FBX28_HUMAN  | GPX1_HUMAN  | IFNB_HUMAN  | IBP3_HUMAN  |
| CXB1_HUMAN  | FETUA_HUMAN  | GRB14_HUMAN | IFNG_HUMAN  | ICAM1_HUMAN |
| CXCL2_HUMAN | FFAR1_HUMAN  | GROA_HUMAN  | IGF1_HUMAN  | IDE_HUMAN   |
| CXL10_HUMAN | FFAR4_HUMAN  | GSHR_HUMAN  | IGF1R_HUMAN | IF2A_HUMAN  |
| CY24B_HUMAN | FGF1_HUMAN   | GSK3A_HUMAN | IGF2_HUMAN  | IF5A1_HUMAN |
| DCE1_HUMAN  | FGF19_HUMAN  | GSK3B_HUMAN | IKBA_HUMAN  | IFNB_HUMAN  |
| DCE2_HUMAN  | FGF21_HUMAN  | GSTP1_HUMAN | IKKA_HUMAN  | IFNG_HUMAN  |
| DDIT3_HUMAN | FGFP3_HUMAN  | GTR1_HUMAN  | IKKB_HUMAN  | IGF1_HUMAN  |
| DDX1_HUMAN  | FGFR1_HUMAN  | GTR10_HUMAN | IL10_HUMAN  | IGF1R_HUMAN |
| DECR_HUMAN  | FINC_HUMAN   | GTR2_HUMAN  | IL12A_HUMAN | IGF2_HUMAN  |
| DGAT1_HUMAN | FITM2_HUMAN  | GTR3_HUMAN  | IL12B_HUMAN | IKBA_HUMAN  |
| DGAT2_HUMAN | FKBP5_HUMAN  | GTR4_HUMAN  | IL13_HUMAN  | IKKA_HUMAN  |
| DGKE_HUMAN  | FNDCC5_HUMAN | GTR5_HUMAN  | IL15_HUMAN  | IKKB_HUMAN  |
| DHI1_HUMAN  | FOXA2_HUMAN  | GTR9_HUMAN  | IL17_HUMAN  | IL10_HUMAN  |
| DJC27_HUMAN | FOXA3_HUMAN  | GYS1_HUMAN  | IL18_HUMAN  | IL12A_HUMAN |
| DLK1_HUMAN  | FOXO1_HUMAN  | HDA11_HUMAN | GTR3_HUMAN  | IL12B_HUMAN |
| DNM1L_HUMAN | FOXO3_HUMAN  | HDAC7_HUMAN | GTR4_HUMAN  | IL13_HUMAN  |
| DP13A_HUMAN | FOXP3_HUMAN  | HEPC_HUMAN  | GTR5_HUMAN  | IL15_HUMAN  |

|             |             |             |             |             |
|-------------|-------------|-------------|-------------|-------------|
| IL17_HUMAN  | LIPL_HUMAN  | NGAL_HUMAN  | PER1_HUMAN  | RETN_HUMAN  |
| IL18_HUMAN  | LIPP_HUMAN  | NLRP3_HUMAN | PERM_HUMAN  | RGS10_HUMAN |
| IL1A_HUMAN  | LIPS_HUMAN  | NOS2_HUMAN  | PGBM_HUMAN  | RHG21_HUMAN |
| IL1B_HUMAN  | LOXE3_HUMAN | NOS3_HUMAN  | PGH2_HUMAN  | RHOA_HUMAN  |
| IL1RA_HUMAN | LPIN1_HUMAN | NOTC1_HUMAN | PIN1_HUMAN  | RICTR_HUMAN |
| IL2_HUMAN   | LRP1_HUMAN  | NOX1_HUMAN  | PK3CA_HUMAN | RN186_HUMAN |
| IL2RA_HUMAN | LUM_HUMAN   | NOX3_HUMAN  | PK3CB_HUMAN | ROCK1_HUMAN |
| IL33_HUMAN  | LYAM2_HUMAN | NOX4_HUMAN  | PKNX1_HUMAN | RPGF3_HUMAN |
| IL37_HUMAN  | LZTL1_HUMAN | NPY_HUMAN   | PLCB_HUMAN  | RPTOR_HUMAN |
| IL4_HUMAN   | M3K7_HUMAN  | NR0B2_HUMAN | PLGF_HUMAN  | RS3A_HUMAN  |
| IL6_HUMAN   | MAGD1_HUMAN | NR1H3_HUMAN | PLIN1_HUMAN | RS6_HUMAN   |
| IL7_HUMAN   | MAGE1_HUMAN | NR1H4_HUMAN | PLIN2_HUMAN | RXRA_HUMAN  |
| IL8_HUMAN   | MARH1_HUMAN | NR1I2_HUMAN | PLIN5_HUMAN | S12A3_HUMAN |
| INSI1_HUMAN | MC4R_HUMAN  | NRF1_HUMAN  | PLOD1_HUMAN | S27A1_HUMAN |
| INSL5_HUMAN | MCR_HUMAN   | NRG4_HUMAN  | PLPL2_HUMAN | S39A5_HUMAN |
| INSR_HUMAN  | METRL_HUMAN | NTCP2_HUMAN | PON1_HUMAN  | SC5A1_HUMAN |
| IOD2_HUMAN  | MGA_HUMAN   | NUCB2_HUMAN | PPARA_HUMAN | SC5A2_HUMAN |
| IRS1_HUMAN  | MGAT1_HUMAN | OCLN_HUMAN  | PPARD_HUMAN | SCRB1_HUMAN |
| IRS2_HUMAN  | MGLL_HUMAN  | ODPX_HUMAN  | PPARG_HUMAN | SEPT6_HUMAN |
| IRS4_HUMAN  | MICU1_HUMAN | OGRL1_HUMAN | PRD16_HUMAN | SFRP5_HUMAN |
| ISL1_HUMAN  | MK03_HUMAN  | OLFM4_HUMAN | PRDM4_HUMAN | SHBG_HUMAN  |
| ITAM_HUMAN  | MK08_HUMAN  | OREX_HUMAN  | PRG4_HUMAN  | SHIP2_HUMAN |
| ITAX_HUMAN  | MKRN1_HUMAN | OSTCN_HUMAN | PRGC1_HUMAN | SIR1_HUMAN  |
| ITLN1_HUMAN | MLXPL_HUMAN | OSTP_HUMAN  | PRGC2_HUMAN | SIR3_HUMAN  |
| JAK2_HUMAN  | MMP2_HUMAN  | OXYR_HUMAN  | PRL_HUMAN   | SIR6_HUMAN  |
| JIP1_HUMAN  | MMP9_HUMAN  | P2RY2_HUMAN | PROS_HUMAN  | SKIL_HUMAN  |
| JUN_HUMAN   | MOT11_HUMAN | P53_HUMAN   | PTEN_HUMAN  | SMAD2_HUMAN |
| K1C18_HUMAN | MRC1_HUMAN  | PAFA_HUMAN  | PTHY_HUMAN  | SMAD3_HUMAN |
| KKCC2_HUMAN | MSRE_HUMAN  | PAHO_HUMAN  | PTN_HUMAN   | SMS_HUMAN   |
| KLOTB_HUMAN | MTOR_HUMAN  | PAI1_HUMAN  | PTN1_HUMAN  | SNP23_HUMAN |
| KPCE_HUMAN  | MTP_HUMAN   | PAQR1_HUMAN | PUM3_HUMAN  | SOAT1_HUMAN |
| KPYM_HUMAN  | MYD88_HUMAN | PAQR2_HUMAN | PUR1_HUMAN  | SOCS3_HUMAN |
| LAMA4_HUMAN | MYOD1_HUMAN | PARK7_HUMAN | PUR9_HUMAN  | SODC_HUMAN  |
| LBP_HUMAN   | NAL12_HUMAN | PCKGC_HUMAN | PYC_HUMAN   | SODM_HUMAN  |
| LCAT_HUMAN  | NALP2_HUMAN | PCNA_HUMAN  | PYGO2_HUMAN | SPA12_HUMAN |
| LDLR_HUMAN  | NAMPT_HUMAN | PCP_HUMAN   | PYY_HUMAN   | SRBP1_HUMAN |
| LEG3_HUMAN  | NCF1_HUMAN  | PCSK9_HUMAN | RAC1_HUMAN  | SRBP2_HUMAN |
| LEP_HUMAN   | NDUA5_HUMAN | PDE3B_HUMAN | RAGE_HUMAN  | STA5A_HUMAN |
| LEPR_HUMAN  | NEMF_HUMAN  | PKD4_HUMAN  | RARR2_HUMAN | STAT3_HUMAN |
| LFG3_HUMAN  | NEU1_HUMAN  | PDX1_HUMAN  | RENI_HUMAN  | STK11_HUMAN |
| LIPC_HUMAN  | NF2L2_HUMAN | PEDF_HUMAN  | RET4_HUMAN  | SUCB1_HUMAN |

|             |             |             |             |             |
|-------------|-------------|-------------|-------------|-------------|
| SYVN1_HUMAN | TNFA_HUMAN  | TXNIP_HUMAN | VASH1_HUMAN | XBP1_HUMAN  |
| TBCD1_HUMAN | TNR1A_HUMAN | TY3H_HUMAN  | VCAM1_HUMAN | XCR1_HUMAN  |
| TBCD4_HUMAN | TNR5_HUMAN  | UBC_HUMAN   | VDR_HUMAN   | XDH_HUMAN   |
| TF7L2_HUMAN | TPC_HUMAN   | UBP10_HUMAN | VEGFA_HUMAN | ZA2G_HUMAN  |
| TFAM_HUMAN  | TR11B_HUMAN | UBP19_HUMAN | VGFR2_HUMAN | ZHANG_HUMAN |
| TGFB1_HUMAN | TRH_HUMAN   | UBP20_HUMAN | VLDLR_HUMAN | ZO1_HUMAN   |
| TIMP1_HUMAN | TRIB3_HUMAN | UCP1_HUMAN  | WDR13_HUMAN |             |
| TLR2_HUMAN  | TRPM2_HUMAN | UCP2_HUMAN  | WNT5A_HUMAN |             |
| TLR4_HUMAN  | TSP1_HUMAN  | UCP3_HUMAN  | X3CL1_HUMAN |             |

**Table S2.** Catalog numbers of siRNAs used in this study.

| Gene Name      | ON-TARGETplus Human siRNA SMARTPool |
|----------------|-------------------------------------|
| <i>INSULIN</i> | L-011058-00-0005                    |
| <i>ZMIZ1</i>   | L-007034-00-0005                    |
| <i>HNF4A</i>   | L-003406-00-0005                    |
| <i>PLK1</i>    | L-003290-00-0005                    |
| <i>ATF4</i>    | L-005125-00-0005                    |
| <i>HSPA5</i>   | L-008198-00-0005                    |
| <i>GHSR</i>    | L-005513-00-0005                    |

**Table S3.** Details of the Dharmacon master siRNA library. The Dharmacon master library plate sets contain the number of plates, wells and siRNAs as listed below. From these master plate sets, four sets of “daughter plates” are created containing a subset volume of 7.5  $\mu$ L from the master plates in each well.

| siRNA Master library                              | Number of plates | Number of wells | Number of siRNAs |
|---------------------------------------------------|------------------|-----------------|------------------|
| Human Druggable Subsets<br>Dharmacon, G-104675-E2 | 10               | 11,000          | 2750             |
| Human Drug Targets<br>Dharmacon, G-104655-E2      | 18               | 19,144          | 4786             |
| Human Genome<br>Dharmacon, G-106500-E2            | 38               | 41,680          | 10,420           |
| Total                                             | 66               | 71,824          | 17,956           |

**Table S4.** Assay IDs of TaqMan probes used in the study.

| Gene Name      | Assay ID      |
|----------------|---------------|
| <i>TBP</i>     | Hs00427620_m1 |
| <i>INSULIN</i> | Hs00355773_m1 |
| <i>ZMIZ1</i>   | Hs01119362_m1 |
| <i>HNF4A</i>   | Hs00230853_m1 |
| <i>ATF4</i>    | Hs00909569_g1 |
| <i>HSPA5</i>   | Hs00946087_g1 |
| <i>GHSR</i>    | Hs00269780_s1 |

**Table S5:** Hits from siRNA screen.

| UniProt IDs | Gene Name | Plate Number | $\beta$ Value<br>Insulin<br>Secretion 0<br>mM Glucose | $\beta$ Value cell<br>Number 0<br>mM Glucose | $\beta$ Value<br>Insulin<br>Secretion<br>20 mM<br>Glucose | $\beta$ Value<br>Cell<br>Number<br>20 mM<br>Glucose | $\beta$ Value<br>Insulin<br>Secretion<br>20 mM<br>Glucose +<br>IBMX | $\beta$ Value<br>Cell<br>Number 20<br>mM<br>Glucose +<br>IBMX |
|-------------|-----------|--------------|-------------------------------------------------------|----------------------------------------------|-----------------------------------------------------------|-----------------------------------------------------|---------------------------------------------------------------------|---------------------------------------------------------------|
| AA2AR_HUMAN | ADORA2A   | 1            | -0.77                                                 | -0.40                                        | -1.96                                                     | -0.46                                               | -2.27                                                               | -0.33                                                         |
| ABHD6_HUMAN | ABHD6     | 5            | -0.21                                                 | -0.58                                        | 2.01                                                      | -0.36                                               | -0.02                                                               | -0.55                                                         |
| ADIPL_HUMAN | FAM132A   | 7            | -1.88                                                 | -2.58                                        | -1.37                                                     | -0.60                                               | -1.70                                                               | -1.18                                                         |
| AGRP_HUMAN  | AGRP      | 6            | -1.74                                                 | -0.45                                        | -0.06                                                     | -1.34                                               | -0.36                                                               | -0.85                                                         |
| ANGL3_HUMAN | ANGPTL3   | 5            | 1.36                                                  | -0.24                                        | 2.94                                                      | -0.70                                               | 0.97                                                                | -0.22                                                         |
| ANGL4_HUMAN | ANGPTL4   | 7            | -1.71                                                 | -0.24                                        | -1.00                                                     | 0.56                                                | -1.53                                                               | -0.53                                                         |
| APOA5_HUMAN | APOA5     | 6            | -1.43                                                 | 0.48                                         | -2.56                                                     | 0.24                                                | -0.39                                                               | -0.31                                                         |
| APOM_HUMAN  | APOM      | 3            | -1.40                                                 | -1.72                                        | -0.30                                                     | -0.66                                               | -1.77                                                               | -1.20                                                         |
| AQP7_HUMAN  | AQP7      | 1            | -0.72                                                 | 0.08                                         | -0.95                                                     | -0.67                                               | -1.51                                                               | -0.40                                                         |
| ATF4_HUMAN  | ATF4      | 4            | -0.34                                                 | 0.19                                         | -2.69                                                     | -0.08                                               | -3.08                                                               | -0.77                                                         |
| ATF6A_HUMAN | ATF6      | 4            | 0.12                                                  | 0.54                                         | 1.72                                                      | 0.58                                                | -0.79                                                               | 0.93                                                          |
| BIP_HUMAN   | HSPA5     | 2            | -1.77                                                 | 0.19                                         | -2.30                                                     | -0.57                                               | -2.37                                                               | -0.70                                                         |
| CART_HUMAN  | CARTPT    | 7            | -1.70                                                 | -1.23                                        | -1.43                                                     | -0.10                                               | -1.76                                                               | -0.74                                                         |
| CASP3_HUMAN | CASP3     | 2            | -0.78                                                 | 0.68                                         | -0.93                                                     | 1.05                                                | -1.71                                                               | -0.25                                                         |
| CCND1_HUMAN | CCND1     | 5            | -1.25                                                 | -0.63                                        | -1.82                                                     | -0.51                                               | -0.72                                                               | -0.48                                                         |
| CCR5_HUMAN  | CCR5      | 1            | 1.91                                                  | 0.15                                         | 1.92                                                      | -0.14                                               | 1.06                                                                | 0.02                                                          |
| CD14_HUMAN  | CD14      | 4            | 3.97                                                  | 0.08                                         | 1.56                                                      | 0.31                                                | 1.74                                                                | 0.10                                                          |
| CISY_HUMAN  | CS        | 3            | 0.07                                                  | -0.28                                        | -0.13                                                     | -0.65                                               | -1.52                                                               | -0.69                                                         |
| CML1_HUMAN  | CMKLR1    | 1            | -0.08                                                 | -0.51                                        | -0.48                                                     | 0.22                                                | -1.50                                                               | 0.86                                                          |
| CREG1_HUMAN | CREG1     | 3            | -0.85                                                 | -0.13                                        | -0.08                                                     | 0.14                                                | -1.58                                                               | -0.30                                                         |
| CRTC2_HUMAN | CRTC2     | 6            | -1.80                                                 | -0.70                                        | -0.94                                                     | -0.81                                               | -0.47                                                               | 0.12                                                          |
| CSF2_HUMAN  | CSF2      | 3            | 2.18                                                  | -1.89                                        | 1.05                                                      | -2.06                                               | 0.34                                                                | -2.67                                                         |
| CXL10_HUMAN | CXCL10    | 6            | -1.67                                                 | -0.52                                        | -0.62                                                     | -1.03                                               | -0.98                                                               | -1.12                                                         |
| DGAT2_HUMAN | DGAT2     | 5            | 2.01                                                  | -1.62                                        | 0.48                                                      | -2.40                                               | -0.88                                                               | -1.43                                                         |
| DUPD1_HUMAN | DUPD1     | 6            | -1.70                                                 | -1.32                                        | -2.58                                                     | -2.06                                               | -1.26                                                               | -1.23                                                         |
| E2AK3_HUMAN | EIF2AK3   | 1            | -0.70                                                 | 1.34                                         | -1.51                                                     | 1.23                                                | -0.05                                                               | 1.23                                                          |
| ERBB4_HUMAN | ERBB4     | 1            | 0.02                                                  | 0.76                                         | 1.56                                                      | -0.03                                               | 0.15                                                                | 0.03                                                          |
| ERN1_HUMAN  | ERN1      | 1            | -1.51                                                 | -0.04                                        | -1.93                                                     | -0.34                                               | -3.04                                                               | -0.13                                                         |
| FETUA_HUMAN | AHSG      | 6            | -0.31                                                 | -0.11                                        | -1.59                                                     | -1.45                                               | -1.24                                                               | -0.89                                                         |
| FGF19_HUMAN | FGF19     | 3            | -0.71                                                 | -1.09                                        | -0.48                                                     | -0.91                                               | -1.52                                                               | -1.16                                                         |
| FGF21_HUMAN | FGF21     | 5            | -0.10                                                 | 0.48                                         | -1.64                                                     | -0.03                                               | -0.92                                                               | 0.44                                                          |
| FOXA2_HUMAN | FOXA2     | 4            | -3.45                                                 | -1.22                                        | -3.50                                                     | -2.56                                               | -3.43                                                               | -3.79                                                         |
| GHR_HUMAN   | GHR       | 4            | -1.48                                                 | -0.18                                        | -1.34                                                     | 0.13                                                | -1.62                                                               | -0.58                                                         |

|             |                 |   |       |       |       |       |       |       |
|-------------|-----------------|---|-------|-------|-------|-------|-------|-------|
| GHRL_HUMAN  | <i>GHRL</i>     | 6 | -2.73 | -1.17 | -2.20 | -3.08 | -1.59 | -1.61 |
| GHSR_HUMAN  | <i>GHSR</i>     | 1 | 2.55  | -3.34 | 4.95  | -3.47 | 1.35  | -1.47 |
| GLP1R_HUMAN | <i>GLP1R</i>    | 1 | -1.31 | -0.74 | -2.06 | -1.55 | -3.13 | -0.54 |
| GPC5B_HUMAN | <i>GPRC5B</i>   | 1 | -1.96 | -1.40 | -0.58 | -2.22 | -1.73 | -2.05 |
| GSK3B_HUMAN | <i>GSK3B</i>    | 1 | 1.55  | 2.39  | 0.76  | 0.67  | -0.62 | 1.60  |
| GTR5_HUMAN  | <i>SLC2A5</i>   | 2 | -0.87 | 1.52  | -0.78 | 1.23  | -1.55 | 0.57  |
| GTR9_HUMAN  | <i>SLC2A9</i>   | 2 | 1.38  | -1.07 | 1.80  | -1.12 | 0.58  | -1.89 |
| HEPC_HUMAN  | <i>HAMP</i>     | 6 | 1.83  | 0.91  | 1.46  | 1.10  | 0.79  | 1.33  |
| HGF_HUMAN   | <i>HGF</i>      | 2 | 0.69  | -0.73 | 2.60  | -0.38 | 3.80  | -0.20 |
| HMDH_HUMAN  | <i>HMGCR</i>    | 4 | -1.71 | -0.95 | -1.27 | -0.87 | 0.37  | -0.57 |
| HXK4_HUMAN  | <i>GCK</i>      | 1 | 4.85  | -0.24 | 0.30  | -1.24 | 0.23  | -0.24 |
| IBP3_HUMAN  | <i>IGFBP3</i>   | 6 | -1.26 | -0.35 | -1.70 | -1.36 | -0.29 | -0.40 |
| IRS1_HUMAN  | <i>IRS1</i>     | 5 | -1.52 | -0.55 | -1.17 | -0.76 | -1.07 | -0.29 |
| JUN_HUMAN   | <i>JUN</i>      | 3 | -0.98 | -0.91 | -1.19 | -0.48 | -1.72 | -0.89 |
| KKCC2_HUMAN | <i>CAMKK2</i>   | 1 | -0.08 | -0.10 | -0.55 | 0.76  | -1.88 | 0.33  |
| LOXE3_HUMAN | <i>ALOXE3</i>   | 2 | -0.85 | -1.50 | -0.01 | -1.58 | -1.74 | -1.01 |
| MARH1_HUMAN | <i>MARC1</i>    | 2 | -0.44 | -0.73 | -0.39 | -0.54 | -1.53 | -0.41 |
| MC4R_HUMAN  | <i>MC4R</i>     | 1 | -0.39 | -1.08 | -2.08 | -1.71 | -2.59 | -0.71 |
| MK03_HUMAN  | <i>MAPK3</i>    | 1 | 0.68  | -0.72 | 0.99  | -1.79 | 3.12  | -0.65 |
| MMP2_HUMAN  | <i>MMP2</i>     | 2 | -1.71 | 0.42  | -0.26 | 0.80  | -0.49 | -0.21 |
| MMP9_HUMAN  | <i>MMP9</i>     | 2 | -1.17 | 0.79  | -1.53 | 0.62  | -1.26 | -0.35 |
| MSRE_HUMAN  | <i>MSR1</i>     | 4 | 0.04  | 0.49  | -1.00 | -0.31 | -1.99 | -0.50 |
| NCF1_HUMAN  | <i>NCF1</i>     | 7 | -1.17 | -1.42 | -2.87 | -1.27 | -2.95 | -1.40 |
| NEMF_HUMAN  | <i>NEMF</i>     | 6 | -1.47 | -0.43 | -1.63 | -0.17 | -1.82 | -0.47 |
| NF2L2_HUMAN | <i>NFE2L2</i>   | 3 | -1.91 | -1.00 | -1.57 | -1.04 | -0.74 | -2.22 |
| NOS2_HUMAN  | <i>NOS2</i>     | 3 | -1.31 | 0.92  | -0.33 | 0.89  | -1.61 | 0.90  |
| NR0B2_HUMAN | <i>NR0B2</i>    | 4 | -0.90 | -0.24 | -1.73 | 0.19  | -0.84 | 0.02  |
| NRF1_HUMAN  | <i>NRF1</i>     | 2 | -1.23 | -1.15 | -1.24 | -2.62 | -2.36 | -1.39 |
| OXYR_HUMAN  | <i>OXTR</i>     | 1 | 2.01  | 0.28  | 0.24  | -0.89 | 0.67  | 0.15  |
| PAQR2_HUMAN | <i>ADIPOR2</i>  | 6 | -1.05 | -0.52 | -1.94 | -1.02 | -0.94 | -0.35 |
| PCSK9_HUMAN | <i>PCSK9</i>    | 2 | 2.14  | 0.21  | 1.03  | -0.70 | 1.11  | -0.18 |
| PDE3B_HUMAN | <i>PDE3B</i>    | 4 | -1.07 | -1.29 | -2.17 | -1.99 | -3.67 | -1.28 |
| PDK4_HUMAN  | <i>PDK4</i>     | 1 | 1.79  | -1.21 | 2.44  | -0.97 | -0.03 | -0.42 |
| PGH2_HUMAN  | <i>PTGS2</i>    | 4 | 0.31  | 1.50  | 1.66  | 1.36  | 0.03  | 2.18  |
| PK3CA_HUMAN | <i>PIK3CA</i>   | 1 | -1.12 | -0.38 | -1.26 | -1.52 | -2.00 | -0.25 |
| PK3CB_HUMAN | <i>PIK3CB</i>   | 1 | -1.14 | -0.18 | -1.46 | -0.63 | -1.67 | -0.29 |
| PLIN1_HUMAN | <i>PLIN1</i>    | 6 | -0.42 | -0.61 | -1.69 | -0.88 | -0.50 | -0.59 |
| PON1_HUMAN  | <i>PON1</i>     | 1 | -1.62 | -0.53 | -1.44 | -1.09 | -0.72 | -0.65 |
| PRDM4_HUMAN | <i>PRDM4</i>    | 2 | 0.76  | 0.35  | 0.95  | 0.71  | 1.58  | 0.52  |
| PRGC1_HUMAN | <i>PPARGC1A</i> | 5 | -0.83 | -1.15 | -1.53 | -1.46 | -1.40 | -0.84 |
| PUM3_HUMAN  | <i>PUM3</i>     | 6 | -1.27 | -1.64 | -1.65 | -1.49 | -0.60 | -0.96 |



---

|             |                  |   |       |       |       |       |       |       |
|-------------|------------------|---|-------|-------|-------|-------|-------|-------|
| PYGO2_HUMAN | <i>PYGO2</i>     | 6 | -1.46 | -0.29 | -1.64 | -0.22 | -0.52 | -0.19 |
| RPGF3_HUMAN | <i>RAPGEF3</i>   | 6 | -1.27 | -0.17 | -0.48 | -0.19 | -1.69 | -0.12 |
| RPTOR_HUMAN | <i>RPTOR</i>     | 7 | -1.44 | 0.08  | -0.33 | 0.60  | -1.50 | -0.32 |
| RXRA_HUMAN  | <i>RXRA</i>      | 3 | -0.53 | -0.18 | -0.51 | 0.31  | -1.73 | -0.55 |
| SHBG_HUMAN  | <i>SHBG</i>      | 6 | 0.58  | -0.53 | 0.21  | -0.88 | -1.55 | -0.90 |
| SIR1_HUMAN  | <i>SIRT1</i>     | 4 | -0.90 | 0.36  | -1.60 | -0.03 | -1.11 | 0.57  |
| SOAT1_HUMAN | <i>SOAT1</i>     | 4 | -0.85 | -0.41 | 0.46  | -0.69 | -1.80 | -0.62 |
| SOCS3_HUMAN | <i>SOCS3</i>     | 2 | 2.23  | -0.48 | 0.75  | -0.96 | 2.05  | 0.00  |
| SRBP2_HUMAN | <i>SREBF2</i>    | 3 | -0.77 | 0.98  | -1.65 | 1.32  | -1.55 | 1.30  |
| STA5A_HUMAN | <i>STAT5A</i>    | 3 | -1.37 | 0.51  | -1.63 | 1.10  | -0.82 | 0.06  |
| STK11_HUMAN | <i>STK11</i>     | 1 | 0.32  | -0.16 | 1.79  | -0.22 | 1.07  | -0.14 |
| TLR4_HUMAN  | <i>TLR4</i>      | 4 | -1.00 | -0.79 | -1.70 | -0.45 | 0.07  | -0.04 |
| TR11B_HUMAN | <i>TNFRSF11B</i> | 3 | -0.15 | -0.05 | -0.61 | -0.20 | -1.82 | -0.53 |
| TRH_HUMAN   | <i>TRH</i>       | 6 | -0.76 | 0.30  | -1.69 | 0.04  | -0.41 | 0.04  |
| TRIB3_HUMAN | <i>TRIB3</i>     | 1 | -1.79 | 0.74  | -1.51 | -0.34 | -1.20 | -0.21 |
| VASH1_HUMAN | <i>VASH1</i>     | 7 | -1.82 | -0.69 | -0.41 | -0.14 | -1.38 | -1.62 |
| X3CL1_HUMAN | <i>CX3CL1</i>    | 7 | 0.39  | 0.71  | -0.31 | 0.19  | 1.77  | 0.11  |
